# Supplementary material for: Identification of candidate miRNA biomarkers from miRNA regulatory network with application to prostate cancer
Source: J Transl Med. 2014 Mar 11;12:66. doi: 10.1186/1479-5876-12-66 (PMC4007708; doi:10.1186/1479-5876-12-66)
Supplement: Additional file 3 — Candidate prostate cancer miRNA biomarkers predicted from our method. MicroRNAs with high statistical significance (p-value < 0.01, Wilcoxon signed-rank test) were considered as candidate prostate cancer miRNA biomarkers. The references on abnormally expressed miRNAs previously validated in prostate cancer or in other cancers are listed in this table. [file 1479-5876-12-66-S3.xls]

## Sheet: Sheet1
Additional file 3 - Candidate prostate cancer miRNA biomarkers predicted from our method
Rank	miRNA ID	Uniquely regulated genes	P-value	Reported in prostate cancer (PMID)	Reported in other cancers (PMID)
1	miR-93	PAM,FNDC3A,GPRASP1,MAP3K7,CRYAB,TCEAL2,PDE4D,PFKP,ALPK1,TRPM6,CHD9,SNTB2,SH3PXD2A,FYCO1,KIAA0513,ACSL4,FBXO21,LAPTM4A,PLSCR4,RBBP7,PRDM8,VEZF1,SACS,CALD1,TXNIP,UBC,MAT2B,ARSJ,TNFRSF10B,BMP2,LASP1,PLAG1,PKD2,RNF128,ZNF711,DYNC1LI2,ITGB8	1.79e-24		Breast cancer (23492819)
2	miR-1	MXD4,G6PD,TDP1,KIAA1598,POM121,AGRN,ANP32B,BRI3BP,EHMT2,IQGAP3,MOV10,SAC3D1,SLC25A22,ARMC10,HSPD1,NSUN4,PAX3	3.63e-23	22210864
3	miR-27b	ALCAM,NUP210,TPR,NUP155,SCAMP3,CACNA1A,EGLN1,AFG3L2,PRPF19,NECAP1,ATP2B1,ACLY,MRPS14,TGS1	4.01e-23	23300597
4	miR-23b	CRCT1,KEAP1,PKP4,TRIM14,CPSF4,MRPS33,KIAA0922,PIP5K1A,ARHGEF5,NDUFA2,TNKS2,RTN3,SOS1	8.69e-23	18949015
5	miR-155	DNAJC19,DSG2,PTPRJ,TBCA,TRIP13,TXNRD1,CUX1,DCAF7,DOCK4,LCLAT1,MSH2,NFATC2IP,SLC25A40	8.69e-23	20370992
6	miR-30e	GPR125,GGPS1,TOPBP1,PARG,KCTD5,ADAM7,CELSR3,CBX3,GMEB2,SEH1L,UBE2V2,CLN8,ZBTB39	8.69e-23		Epithelial cancer (21340045)
7	miR-22	RCC1,ENO1,BRP44,DPM2,NFYA,IPO7,BCL9,DNAJC7,FNBP4,PPARA,PURB	8.73e-23	20388916
8	miR-149	EIF4A1,SMG5,RPS29,ICA1,RNF2,GOLPH3,RNF138,IPO4,PSME3,MRPL17	1.74e-22	19676045
9	miR-197	ARPC4,RNF113A,CEP63,SSX2,CLINT1,CTNND1,RAD51,TAF4B,UMPS	1.43e-21		Pancreatic cancer (23139153)
10	miR-648	BLCAP,PAK3,SRPX,IL15RA,PPP1R3C,IRF2,KLF9,CALM1,PPAP2B	1.43e-21		Glioblastoma (23340988)
11	miR-152	SRPK2,RMND5A,KLC2,BARD1,LRRC41,CIT,TRIO,RAD23B	2.59e-20	23460133
12	miR-125b	UGT2B15,RBM8A,UGT2B17,PPAT,QSOX2,RNF144A,RPL29,SAMD10	2.59e-20	19676045
13	miR-361-3p	UBE2S,CD3EAP,KIAA0664,DLL3,RAB35,EIF4G1,LARP1	4.76e-18		Lung tumor (22675530)
14	miR-887	NBR1,OSBPL9,TAGLN2,ANGPTL4,CD99,MMP2,COL6A2	4.76e-18
15	let-7g	RFX5,FASTKD2,RNASEH2A,ZC3H3,WASL,BCL2L1	3.06e-15	20873592
16	miR-26b	XPOT,COPS6,RPS6KA6,TMCC1,SLC19A2,ETF1	3.06e-15	21941025
17	miR-361-5p	CDK7,SIGLEC1,RANBP17,RAD23A,NDUFAB1,KLHL18	3.06e-15		Cutaneous squamous cell carcinoma (23166713)
18	miR-766	TWF2,IGFBP6,SLC26A10,APOM,SYDE1,A2M	3.06e-15		Esophageal cancer (21743970)
19	miR-16	OSGEPL1,ZNF559,MRPL20,PSAT1,UTP15,EPT1	3.06e-15	19676045
20	miR-671-5p	GFRA1,PKN2,PTGDS,PJA2,DLC1	5.66e-13		Rectal cancer (22172905)
21	miR-335	CDK2,TRIAP1,SLC25A15,STARD7,UBE2F	5.66e-13	23456549
22	miR-98	RAD17,RNF8,SLC17A5,PEX11B,HIC2	5.66e-13	20873592
23	miR-204	EEF1E1,PPM1H,PDHX,SPDEF	3.65e-09	21446014
24	miR-454	ING2,TRIM37,MAD2L1,ENDOD1	3.65e-09		Colorectal cancer (20429937)
25	miR-500	GADD45A,PLCD1,TMEM51,ZCCHC14	3.65e-09		Hepatocellular cancer (19863192)
26	miR-582-5p	CD40LG,PIAS2,WDR43,WNT11	3.65e-09		Bladder cancer (23295946)
27	miR-636	FEZ1,MBNL2,HMGN4,FHL1	3.65e-09		Hepatocellular cancer (23306701)
28	miR-939	WWTR1,CA4,TCF7,IER5	3.65e-09		Lung cancer (21563230)
29	miR-195	CCNE1,KIF21A,THOC4,SESN1	3.65e-09	21539977
30	miR-365	PREP,BAX,QTRTD1,NUFIP2	3.65e-09		Lung cancer (22185756)
31	miR-224	FAM64A,DEGS1,RALA	4.63e-05	18459106
32	miR-486-5p	PGRMC1,ODZ2,RHOB	4.63e-05		Lung cancer (23474761)
33	miR-619	SNX7,MTCH1,SGCA	4.63e-05
34	miR-877	ARMCX1,VAMP8,EID1	4.63e-05
35	miR-183	SARS,HECTD2,SEMA6D	4.63e-05	19676045
36	miR-376a	CENPF,IARS2,TIMM10	4.63e-05		Pancreatic cancer (17149698)
37	miR-34a	UCK2,PSMD3,MAP3K9	4.63e-05	18834855
38	miR-222	HOXC10,TSPAN13,PRPS1	4.63e-05	19676045
39	miR-24	DCUN1D5,MBD6,ACVR1B	4.63e-05	22815235
